# Supplementary material for: Cytoprotective effects of fisetin against hypoxia-induced cell death in PC12 cells
Source: Royal Society of Chemistry journal article supplement (doi:10.1039/c4fo00948g), 2014-11-19
Supplement: c4fo00948g1.pdf [file c4fo00948g1.pdf]

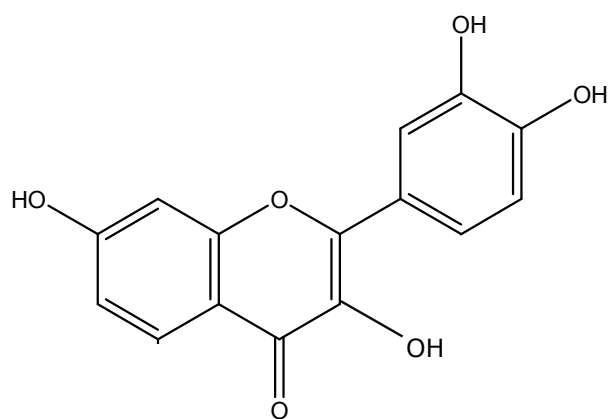

**Supplemental Figure 1.** Chemical structure of fisetin (3,7,3',4'-tetrahydroxyflavone).

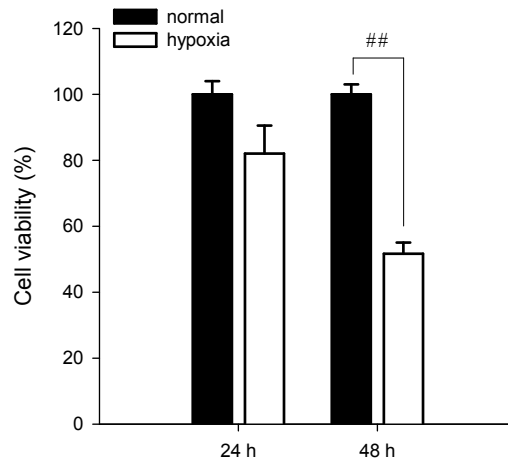

**Supplemental Figure 2.** The cell viability of PC12 cells cultured in a hypoxia incubator. The PC12 cells were cultured under normoxia or in a hypoxia incubator for 24 h or 48 h. The cell viability was measured with the MTT assay. The data represent the mean  $\pm$  SD of three independent experiments. ## $p < 0.01$  represents significant differences compared with cells cultured under normoxia.
